# Supplementary material for: Priority effects of early successional insects influence late successional fungi in dead wood
Source: PubMed Central journal article supplement (PMC4662308; doi:10.1002/ece3.1751), 2015-10-12
Supplement: ECE3-5-4896-s001.pdf [file ECE3-5-4896-s001.pdf]

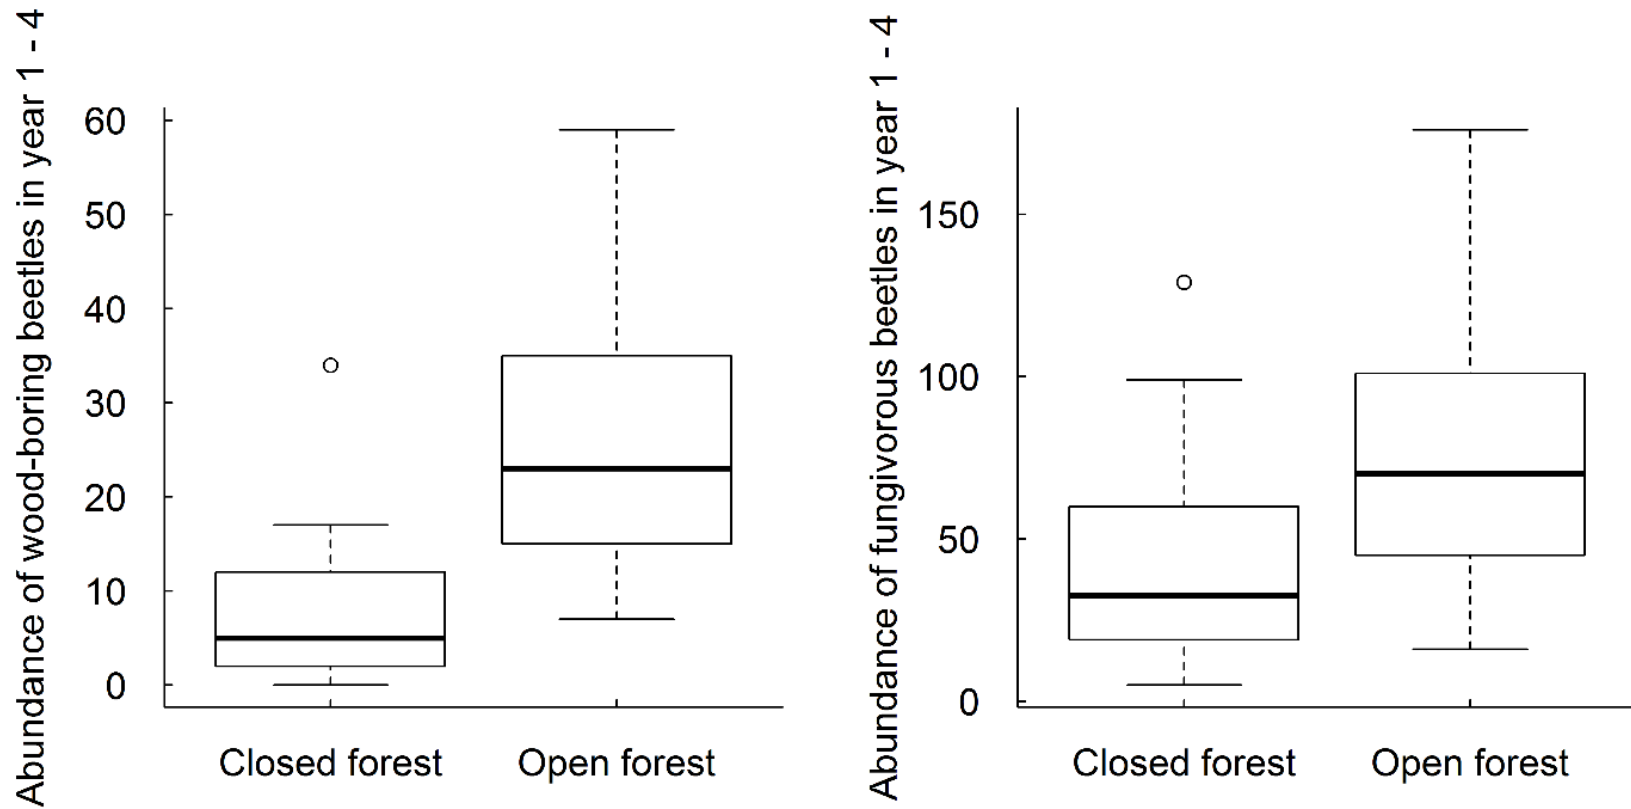

Figure S1. Box plots showing the abundance of wood-boring and fungivorous beetles in year 1 – 4 after tree death in closed and open forest habitat. Wilcoxon rank sum test p-values < 0.001 for both beetle guilds.
